# Supplementary material for: Exploring the potential of halotolerant bacteria from coastal regions to mitigate salinity stress in wheat: physiological, molecular, and biochemical insights
Source: Frontiers journal article supplement (doi:10.3389/fpls.2023.1224731), 2023-09-22
Supplement: Data_Sheet_1.PDF [file Data_Sheet_1.PDF]

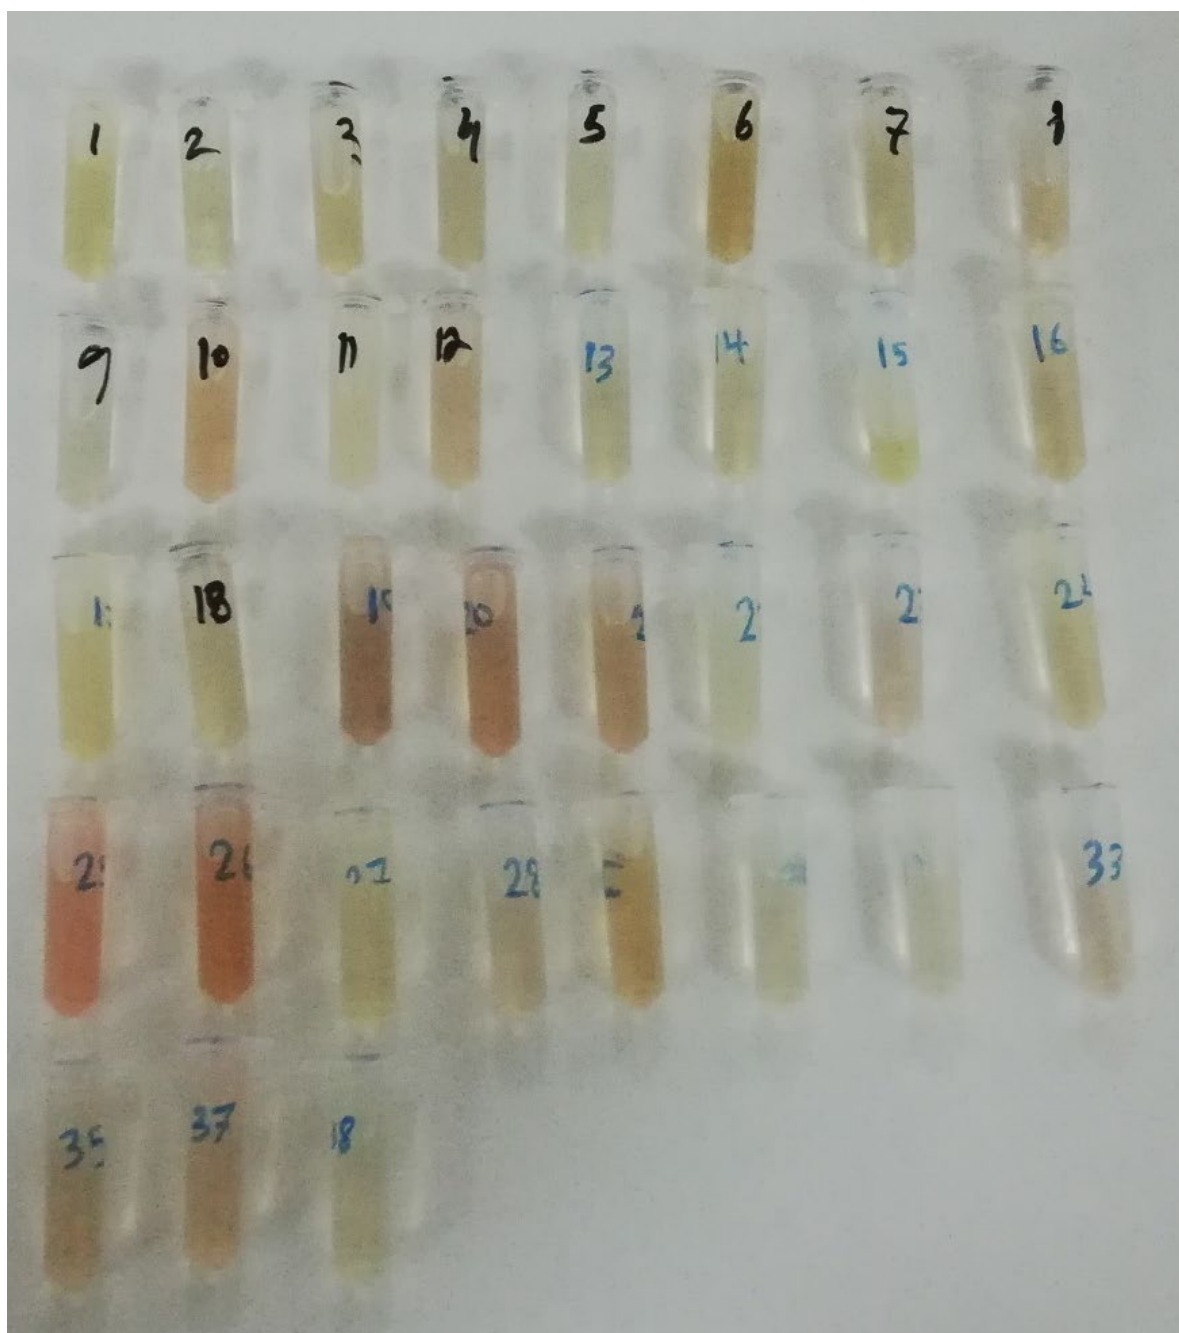

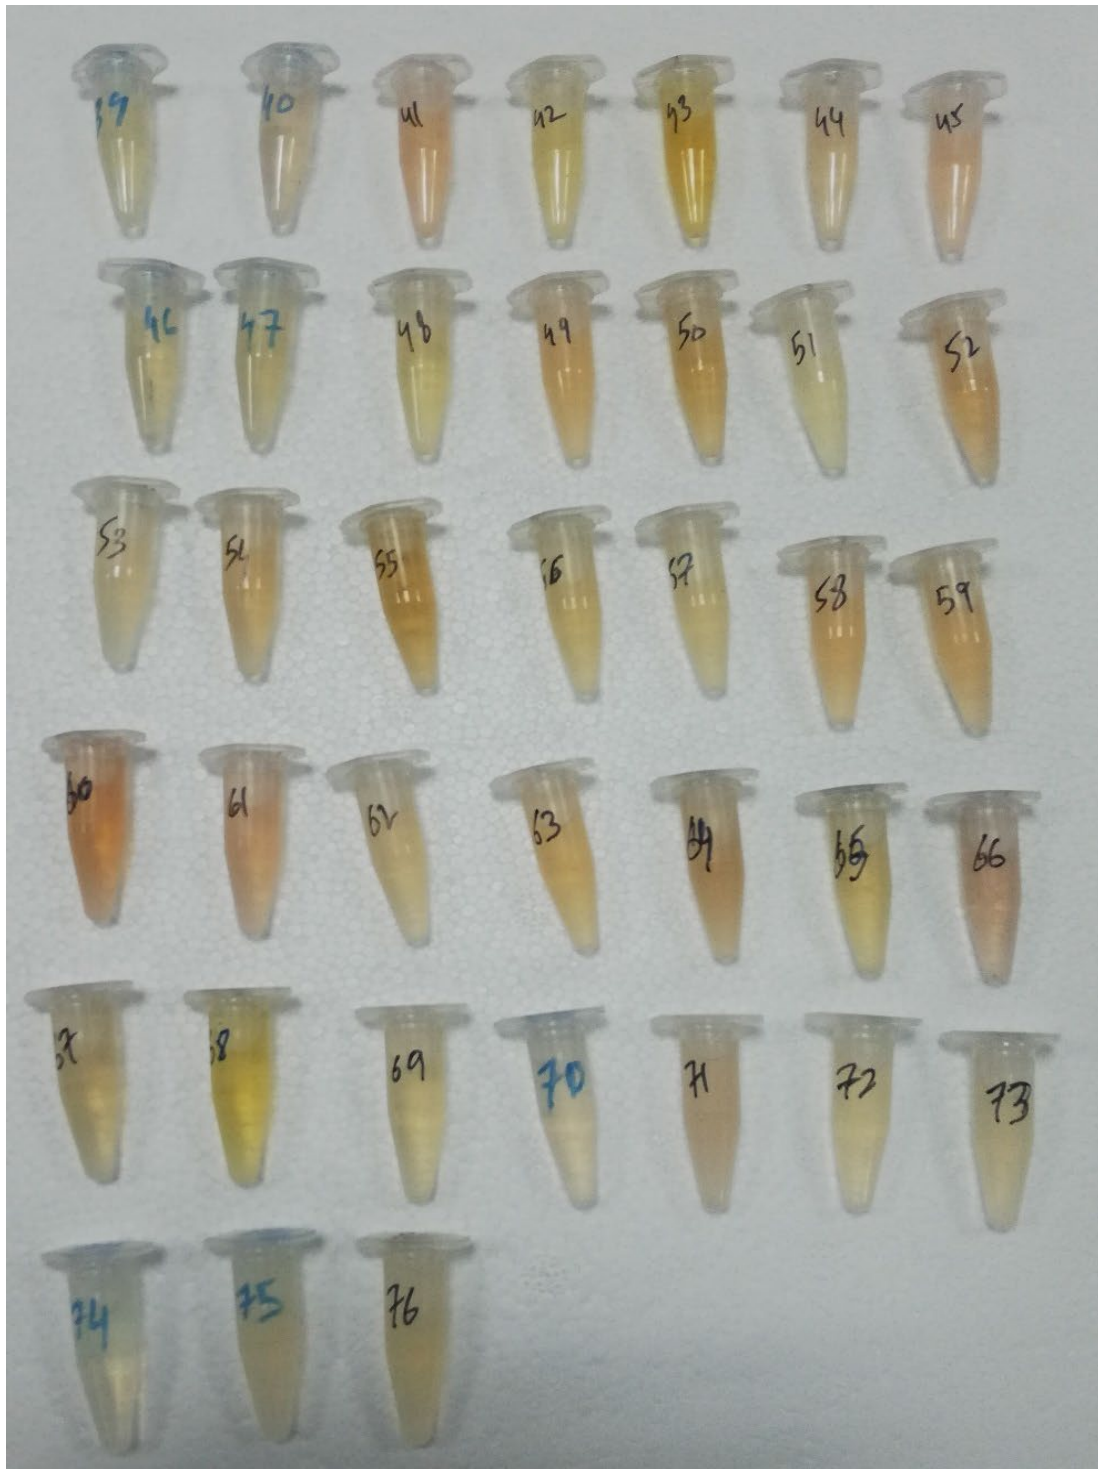

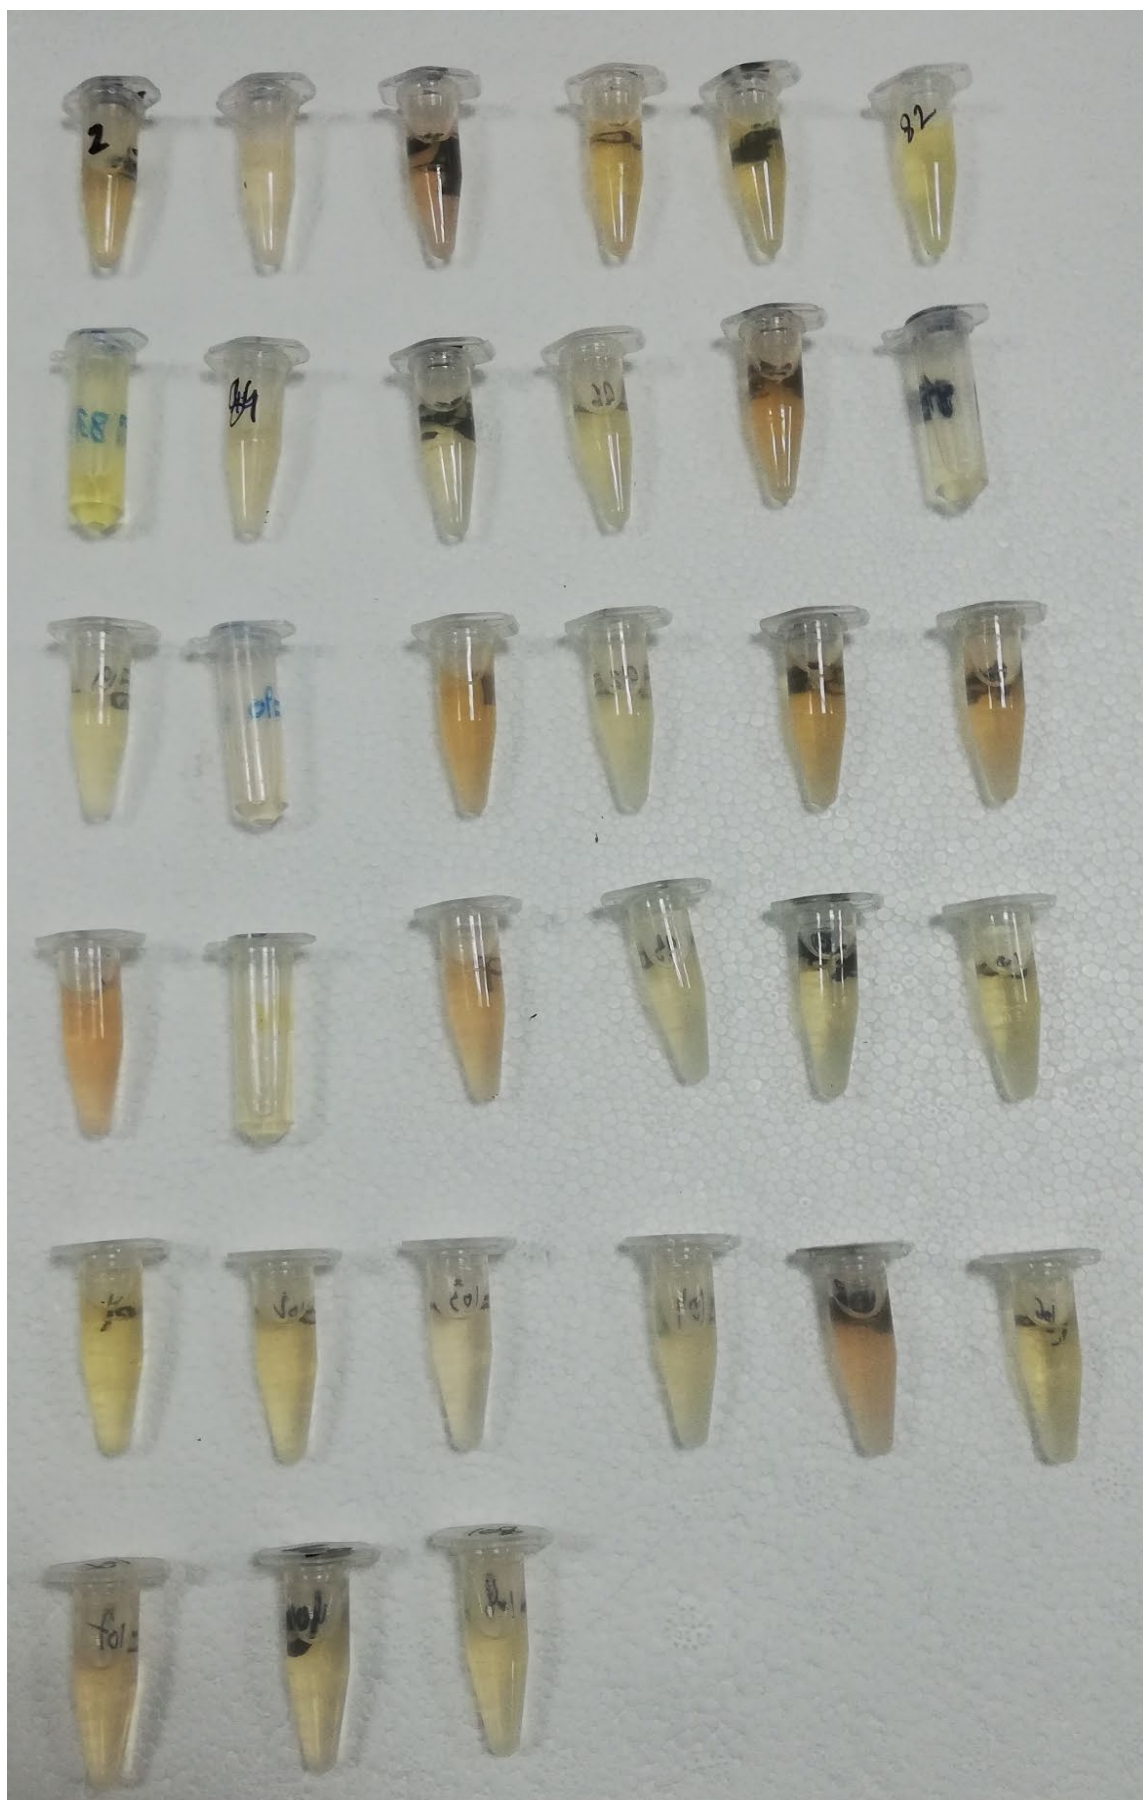

**Figure S1.** Variable color responses depending on the IAA amount using Salkowski's reagent biosynthesized by isolated strains.
